# Supplementary material for: The tumour microenvironment harbours ontogenically distinct dendritic cell populations with opposing effects on tumour immunity
Source: PubMed Central journal article supplement (PMC5196231; doi:10.1038/ncomms13720), 2016-12-23
Supplement: ncomms13720-s1.pdf [file ncomms13720-s1.pdf]

Gated on CD11b<sup>+</sup> Ly6G<sup>-</sup> SiglecF<sup>-</sup>

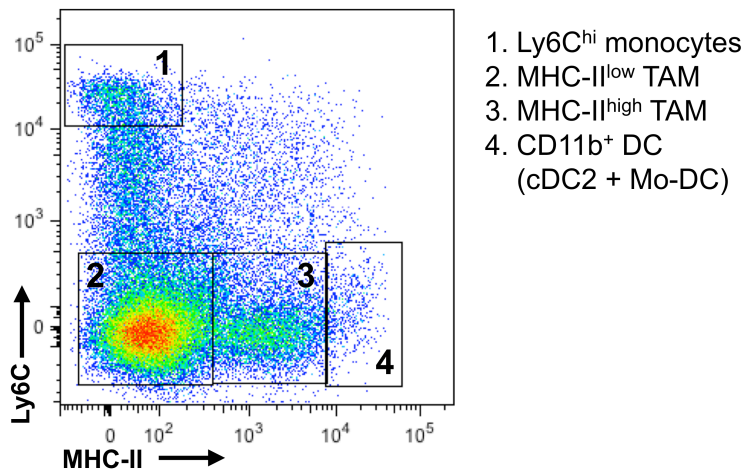

**Supplementary figure 1, related to main figure 1. Gating of monocytes and tumor-associated macrophages in 3LL-R lung carcinoma**

Representative plot of 12-day old 3LL-R tumor gated on CD11b<sup>+</sup> Ly6G<sup>-</sup> SiglecF<sup>-</sup> cells, showing a high infiltration of (1) Ly6C<sup>high</sup> monocytes, (2) MHC-II<sup>low</sup> and (3) MHC-II<sup>high</sup> TAM.

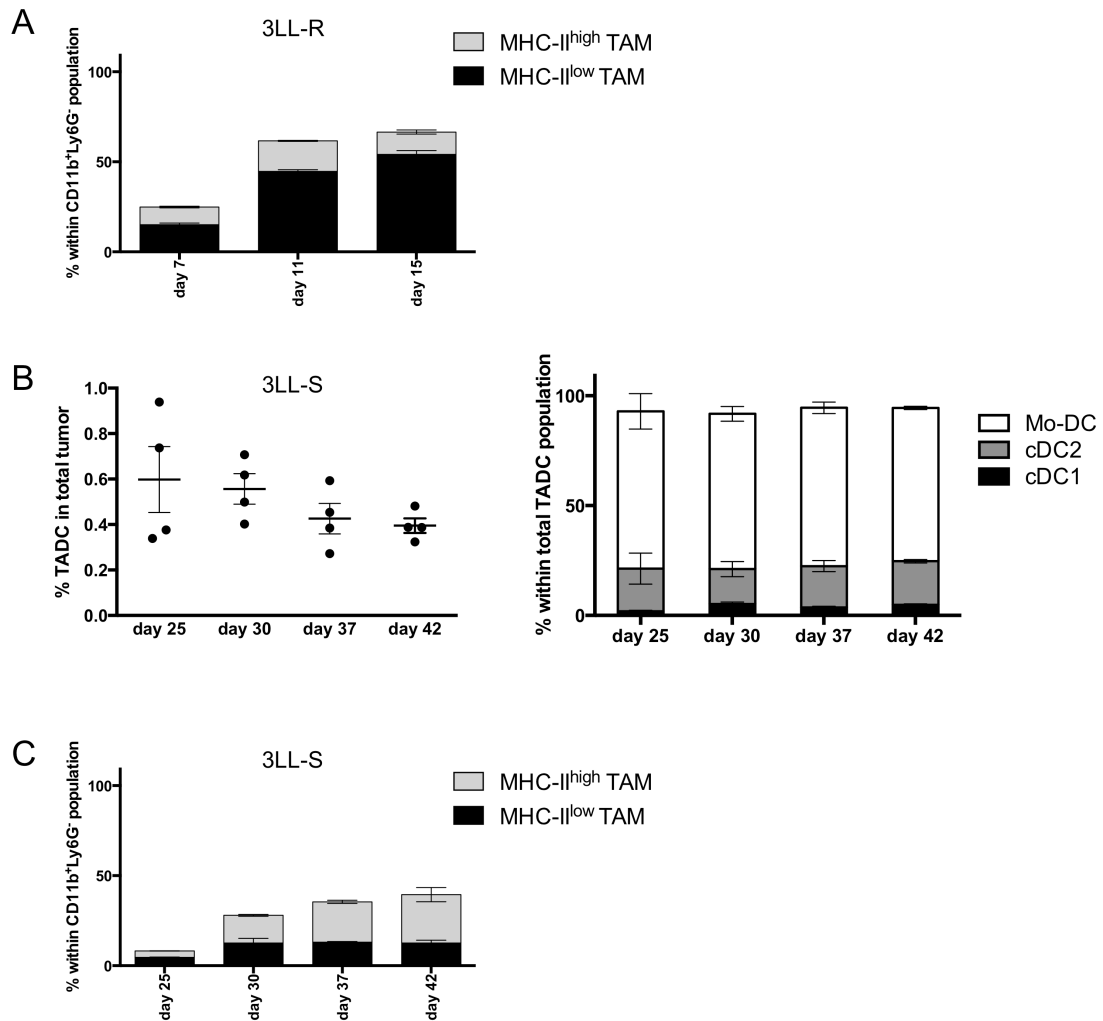

**Supplementary figure 2, related to main figure 2. Several tumor types are infiltrated with distinct TADC subsets**

(A) The amount of TAM subsets was assessed in single cell suspensions of 7, 11 and 15 day-old 3LL-R tumors. (B-C) The percentages of total TADC (B, left panel), TADC subsets (B, right panel) and TAM subsets (C) were assessed in single cell suspensions of 25, 30, 37, 42 day-old 3LL-S tumors. Graphs show mean  $\pm$  SEM. Results are representative of 3 independent experiments with  $n \geq 4$ . Statistical analysis by one-way ANOVA. \*,  $p < 0.05$ ; \*\*,  $p < 0.01$ ; \*\*\*,  $p < 0.001$ ; \*\*\*\*,  $p < 0.0001$ .

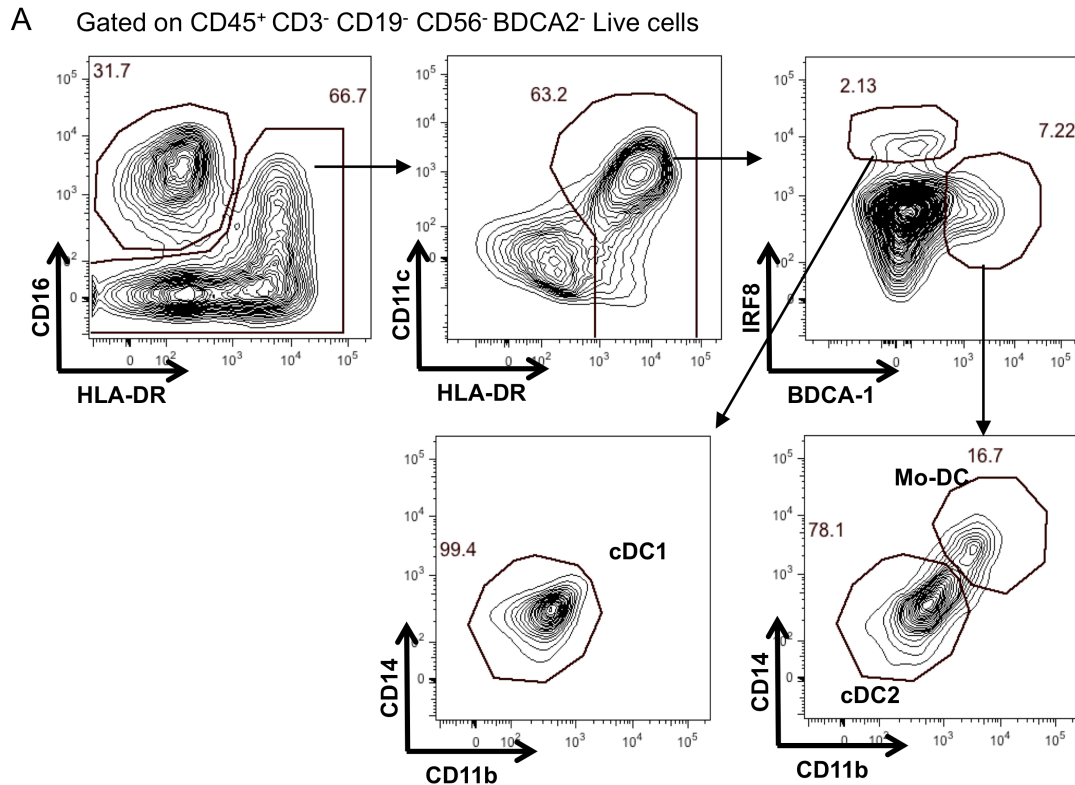

**B** Gated on CD45<sup>+</sup> CD3<sup>-</sup> CD19<sup>-</sup> CD56<sup>-</sup> CD16<sup>-</sup> HLA-DR<sup>+</sup> CD11c<sup>+</sup> BDCA2<sup>-</sup> Live cells

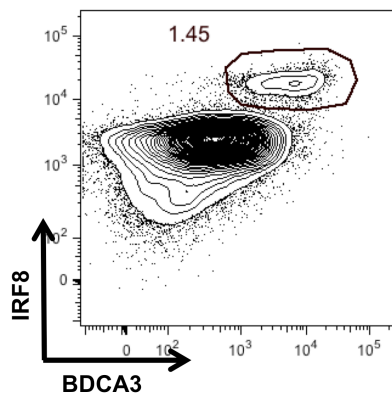

**Supplementary figure 3, related to main figure 3. Gating strategy of TADC subsets in human colorectal and non-small cell lung carcinoma**

(A) Human colorectal (CRC) tumor biopsies were pre-gated on CD45<sup>+</sup> CD3<sup>-</sup> CD19<sup>-</sup> CD56<sup>-</sup> BDCA2<sup>-</sup> live cells and CD16<sup>-</sup> CD11c<sup>high</sup> HLA-DR<sup>+</sup> cells were subdivided in (i) BDCA1<sup>-</sup> IRF8<sup>+</sup> CD14<sup>-</sup> CD11b<sup>low</sup> cDC1, (ii) BDCA1<sup>+</sup> IRF8<sup>-</sup> CD14<sup>-</sup> CD11b<sup>+</sup> cDC2 and (iii) BDCA1<sup>+</sup> IRF8<sup>-</sup> CD14<sup>+</sup> CD11b<sup>high</sup> Mo-DC. (B) Human non-small cell lung carcinoma (NSCLC) tumor biopsies were pre-

gated on CD45<sup>+</sup> CD3<sup>-</sup> CD19<sup>-</sup> CD56<sup>-</sup> BDCA2<sup>-</sup> CD16<sup>-</sup> CD11c<sup>high</sup> HLA-DR<sup>+</sup> live cells, containing a distinct BDCA3<sup>+</sup> IRF8<sup>+</sup> double positive cDC1 subset.

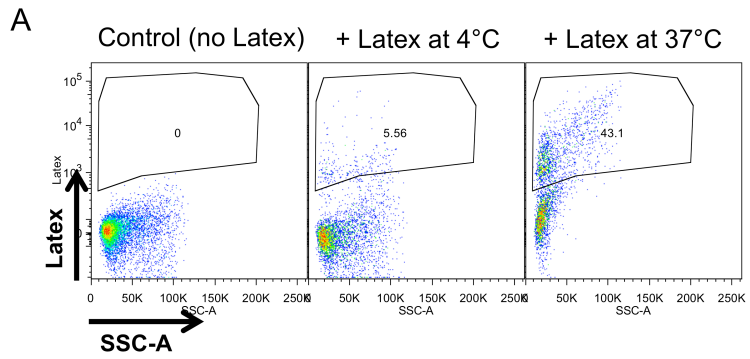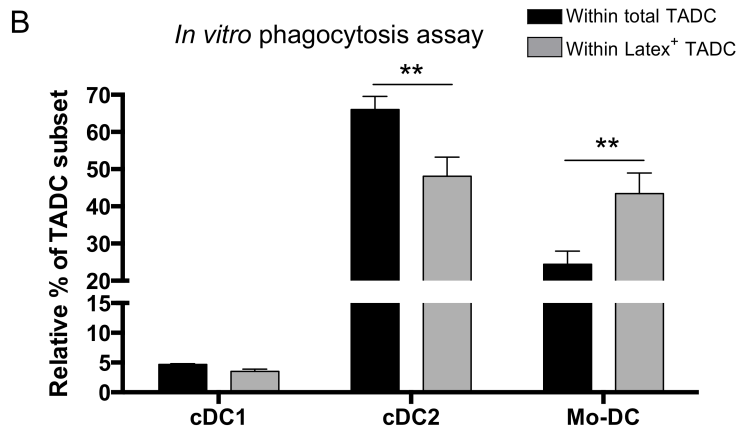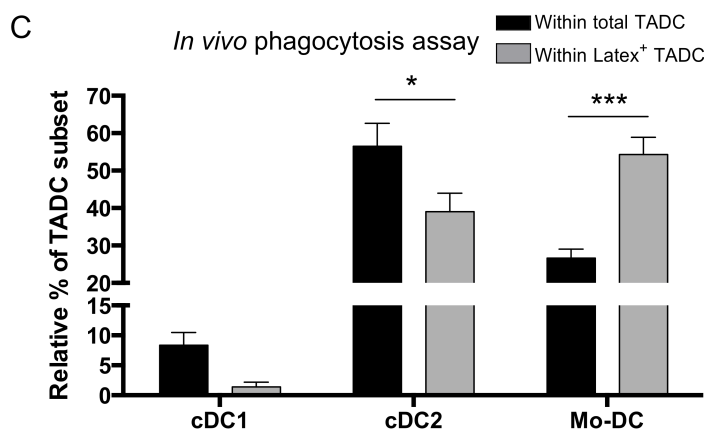

**Supplementary figure 4, related to main figure 4. Antigen uptake and processing differ in the distinct TADC subsets**

(A-B) *In vitro* phagocytosis assay. (A) Single cell suspensions of 12-day old 3LL-R tumors were cultured *in vitro*, in the absence (control) or presence of latex beads for 40 minutes at 4°C or 37°C. (B) The percentage of the distinct TADC subsets within the total TADC gate or within the Latex<sup>+</sup> TADC gate are given. n=3 pools of 4 tumors. Statistical analysis by one-way ANOVA. \*\*, p < 0.01. (C) *In vivo* phagocytosis assay. 12-day old 3LL-R tumor-bearing mice

were injected intravenously with latex beads 2 hours before sacrifice. The percentage of the distinct TADC subsets within the total TADC gate or within the Latex<sup>+</sup> TADC gate are given. n=3 pools of 4 tumors. Statistical analysis by one-way ANOVA. \*, p < 0.05; \*\*\*, p < 0.001.

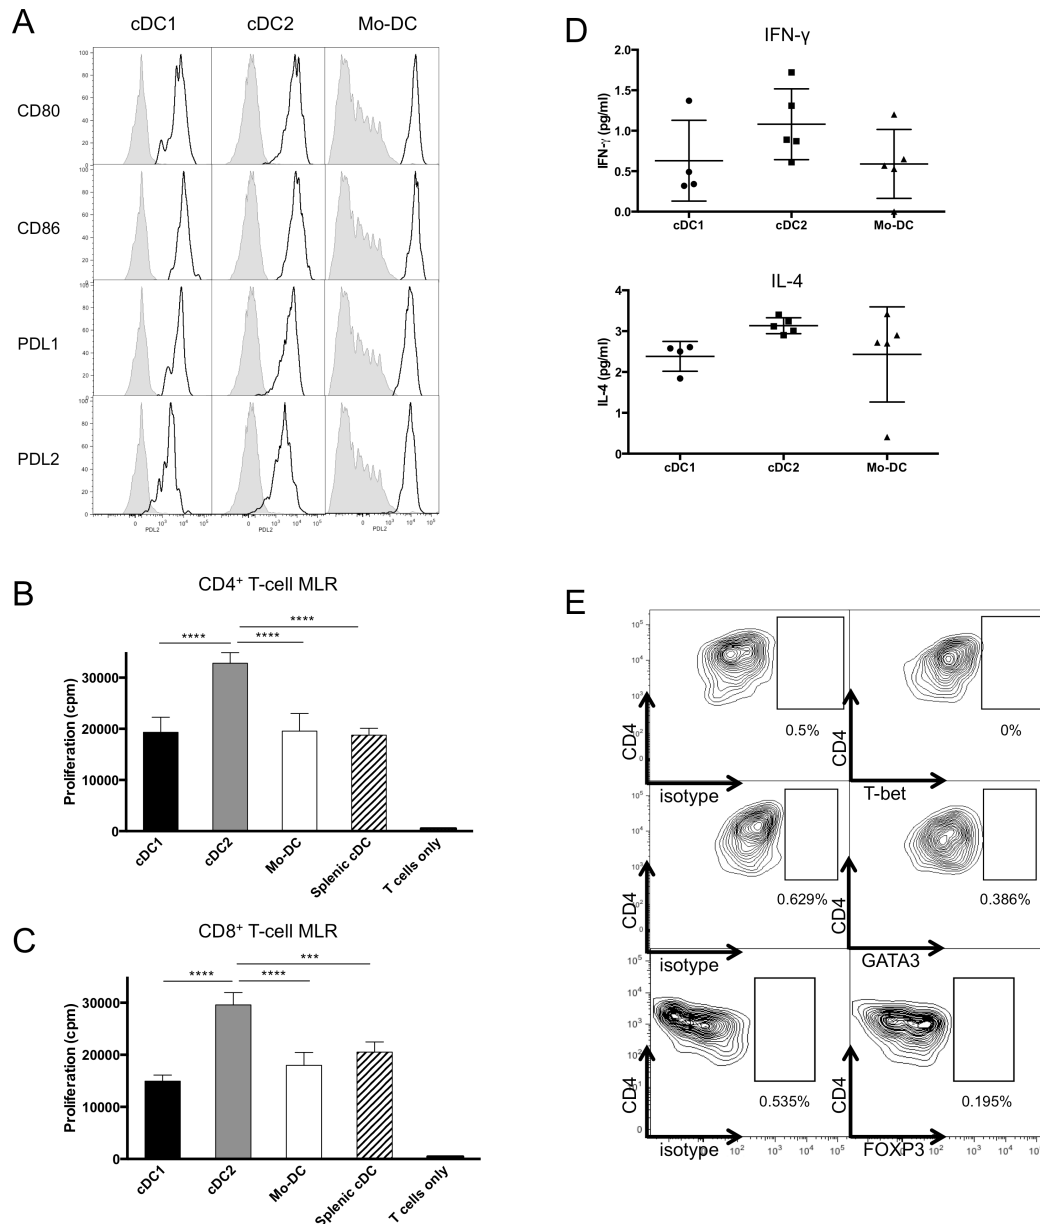

**Supplementary figure 5, related to main figure 5. TADC subsets show distinct T-cell proliferative capacities**

(A) Single cell suspensions of 12-day old 3LL-R tumors were stained for the indicated markers and histogram overlays are shown. Black line = expression of the indicated marker; shaded histogram = isotype control. Results are representative of 2 independent experiments with  $n \geq 4$ . (B-C) Antigen-presenting activities of TADC subsets from 3LL-R tumors in comparison with splenic CD11c<sup>hi</sup>MHC-II<sup>hi</sup>B220<sup>-</sup>Ly6C<sup>-</sup> cDC from naive C57Bl/6 mice. Sorted TADC or splenic cDC were cultured in the presence of purified allogeneic BALB/c CD4<sup>+</sup> (B) or CD8<sup>+</sup> T cells (C) during 5 days and the proliferation of responding T cells was measured via <sup>3</sup>H-thymidine incorporation (cpm).

Results are representative of 2 independent experiments with n=3 pools of 10-12 tumors. Statistical analysis by one-way ANOVA. \*\*\*, p < 0.001; \*\*\*\*, p < 0.0001. (D) Supernatants of co-cultures of TADC subsets and OT-II T cells (DC/OT-II = 1/10) were tested for the presence of IFN- $\gamma$  and IL-4 by luminex. n $\geq$ 4. (E) Intracellular staining on OT-II T cells co-cultured with cDC2 for 3 days at a DC/OT-II ratio of 1/5 was performed for Th-inducing transcription factors T-bet, GATA3 and FOXP3. Isotype control and transcription factor staining are depicted.



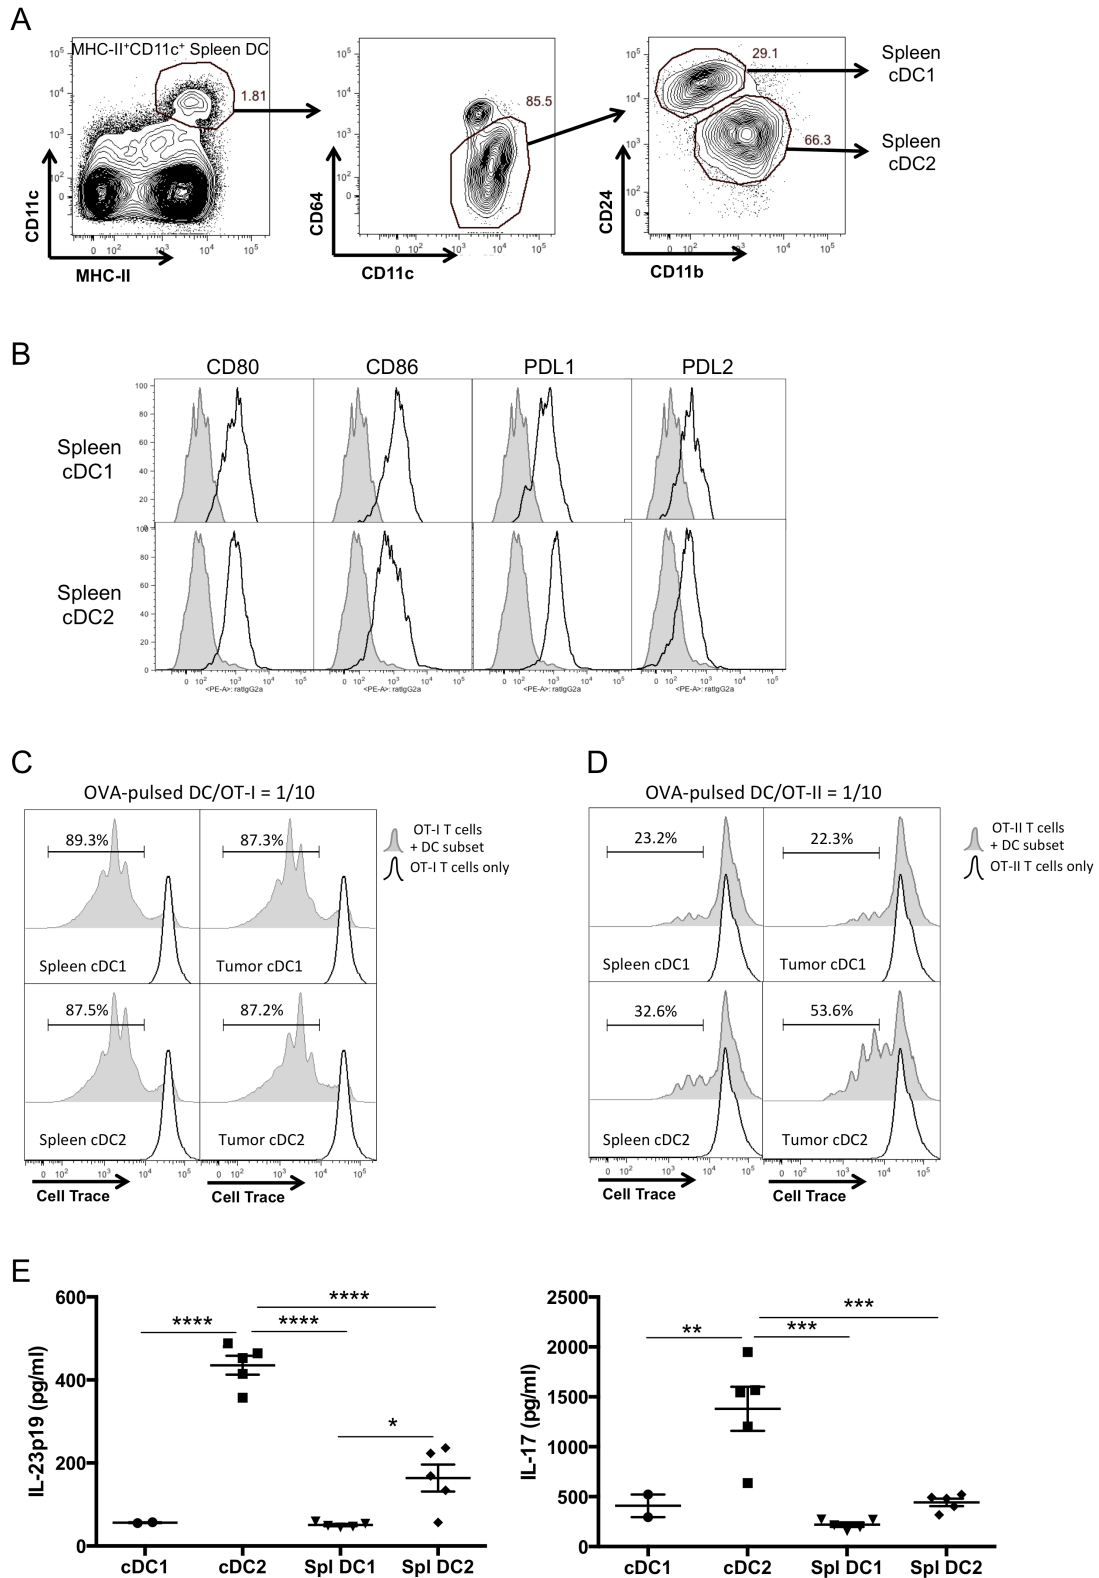

**Supplementary figure 6, related to main figure 5. Tumor-derived cDC display equal to higher T-cell activating capacities as compared to splenic cDC**

(A) Splenic single cell suspensions of naive mice were gated for CD64<sup>lo</sup> MHC-II<sup>hi</sup> CD11c<sup>hi</sup> cells and subdivided in (i) CD24<sup>pos</sup> CD11b<sup>lo</sup> cDC1 and (ii) CD24<sup>low</sup> CD11b<sup>pos</sup> cDC2. (B) Single cell suspensions of naive spleens were stained for the indicated markers and histogram overlays are shown. Black line = expression of the indicated marker; shaded histogram = isotype control. n=4. (C-D) Sorted TADC or splenic cDC subsets were co-cultured with OT-I (C) or OT-II (D) T cells for 3 days at a DC/T-cell ratio of 1/10 in the presence of OVA. The histograms represent CellTrace dilution, indicative for T-cell proliferation. Black line = non-stimulated T cells without DC; shaded histogram = T cells in the presence of DC. Results are representative of 2 independent experiments with n = pool of 12 tumors. (E) Supernatants of co-cultures of TADC or splenic DC subsets and OT-II T cells (DC/OT-II = 1/10) were tested for the presence of IL-23p19 and IL-17 by luminex. n=2 to 5 . Statistical analysis by one-way ANOVA. \*, p < 0.05; \*\*, p < 0.01; \*\*\*, p < 0.001; \*\*\*\*, p < 0.0001.

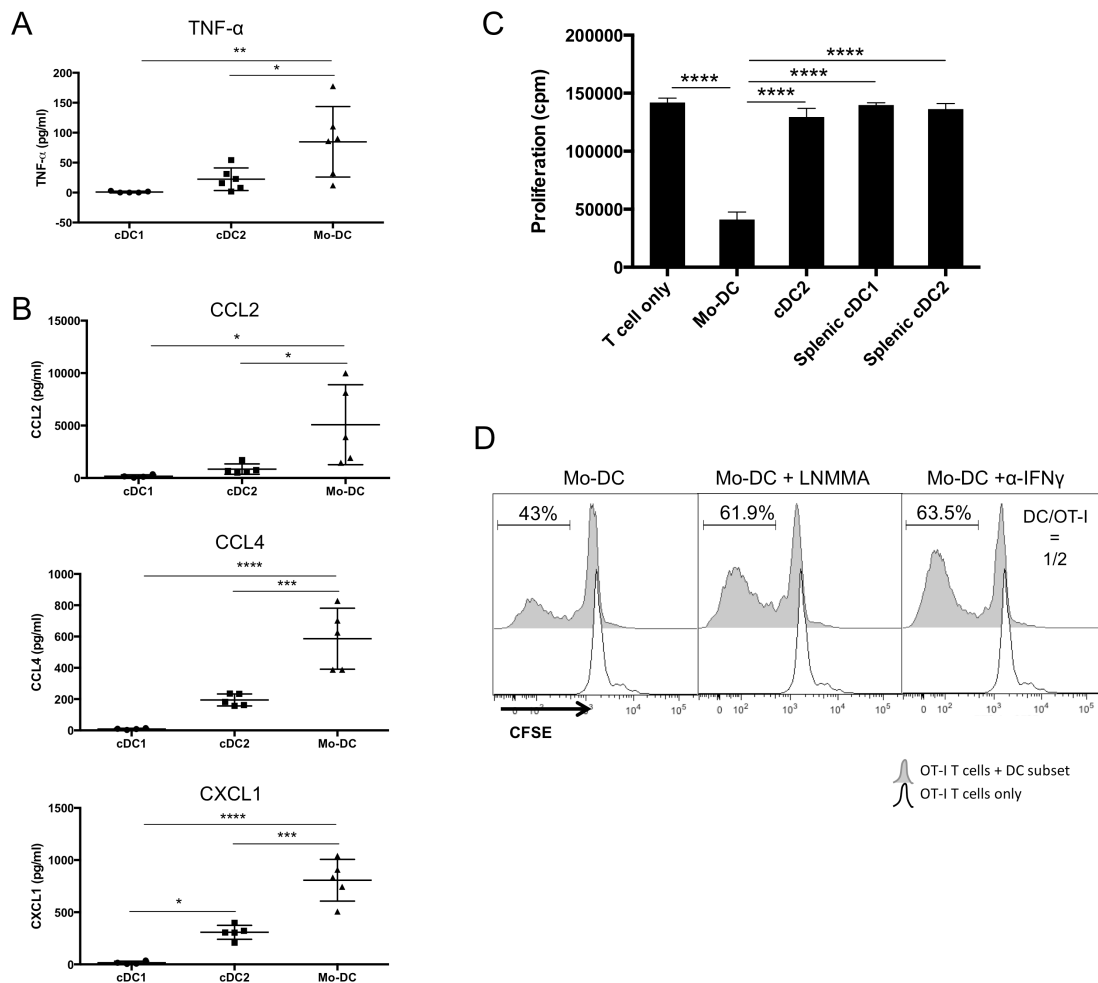

**Supplementary figure 7, related to main figure 6. Mo-DC display an immune suppressive TIP-DC phenotype**

(A-B) Supernatants of sorted TADC subsets cultured for 48h were tested for presence of (A) TNF- $\alpha$ , (B) CCL2, CCL4 and CXCL1 by luminex.  $n \geq 4$ . Statistical analysis by one-way ANOVA. \*,  $p < 0.05$ ; \*\*,  $p < 0.01$ , \*\*\*,  $p < 0.001$ ; \*\*\*\*,  $p < 0.0001$ . (C) Mo-DC and cDC2 sorted from 12-day old 3LL-R tumor single cell suspensions and cDC1 and cDC2 sorted from naive spleens were added to anti-CD3/CD28-stimulated splenocytes at a DC/SPC ratio of 1/4 during 42h and the T-cell proliferation was measured via  $^3\text{H}$ -thymidine incorporation (cpm).  $n =$  pool of 12 tumors. Statistical analysis by one-way ANOVA. \*\*\*\*,  $p < 0.0001$ . (D) Sorted Mo-DC were co-cultured with OT-I T cells for 3 days at a DC/OT-I ratio of 1/2. The histograms represent CFSE dilution, indicative for T-cell proliferation. Conditions compared are: non-stimulated T cells (No TADC) and T cells in the presence of Mo-DC with or without iNOS inhibitor (LNMMA) or  $\alpha$ -IFN- $\gamma$ .  $n=2$ .

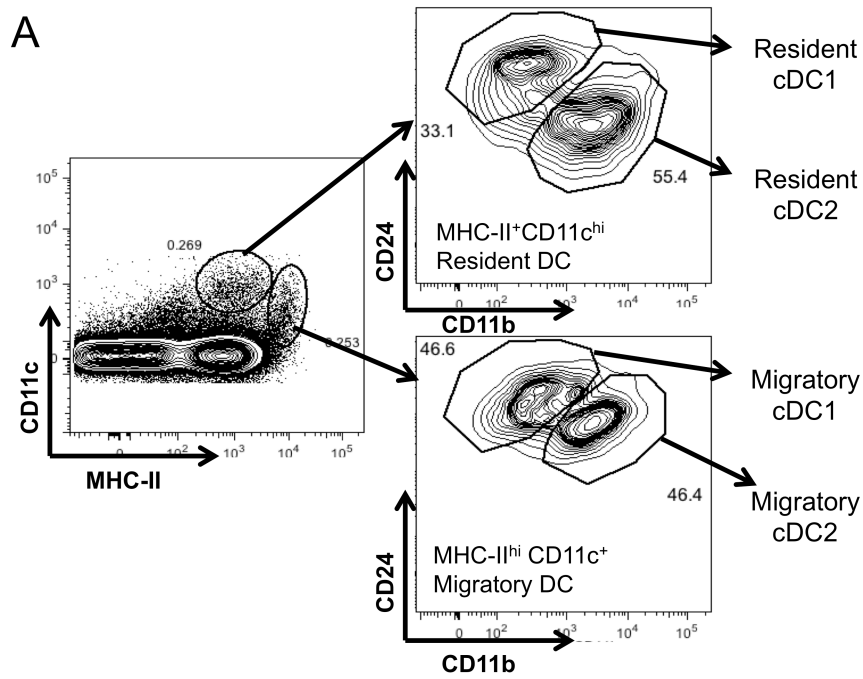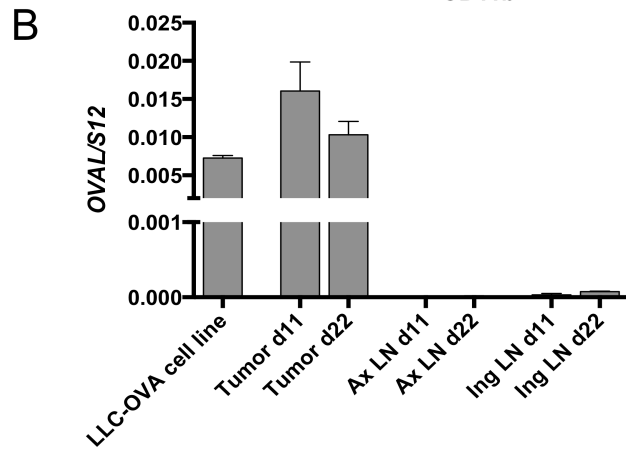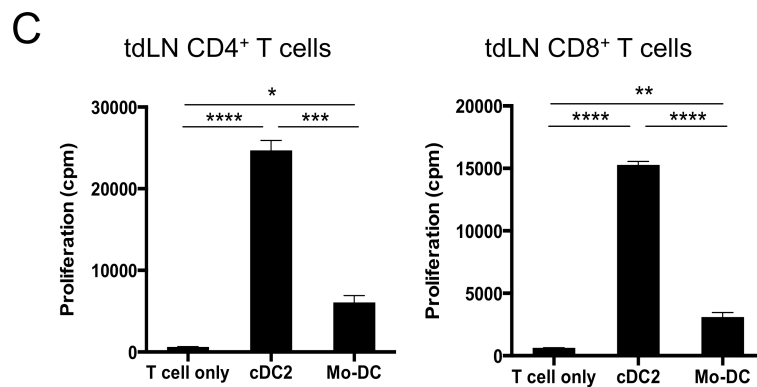

**Supplementary figure 8, related to main figure 7. Both tumor-associated cDC subsets migrate to tumor draining lymph nodes and differentially activate CD8<sup>+</sup> and CD4<sup>+</sup> T cells**

(A) Gating strategy of migratory and resident DCs in tumor draining lymph nodes. Single cell suspension of tumor-draining lymph nodes of 12-day old 3LL-R tumors were subdivided in (i) MHC-II<sup>pos</sup> CD11c<sup>hi</sup> CD24<sup>pos</sup> CD11b<sup>lo</sup> resident cDC1, (ii) MHC-II<sup>pos</sup> CD11c<sup>hi</sup> CD24<sup>low</sup> CD11b<sup>pos</sup> resident cDC2, (iii) MHC-II<sup>hi</sup> CD11c<sup>pos</sup> CD24<sup>pos</sup> CD11b<sup>lo</sup> migratory cDC1 and (iv) MHC-II<sup>hi</sup> CD11c<sup>pos</sup> CD24<sup>low</sup> CD11b<sup>pos</sup> migratory cDC2. (B) Expression of OVA was assessed in LLC-OVA cancer cells and tumor and tumor-draining lymph nodes (axillary or inguinal) of 11-day and 22-day old LLC-OVA tumor-bearing mice using qRT-PCR. The expression was normalized based on the S12 housekeeping gene. n=3. (C) CD4<sup>+</sup> or CD8<sup>+</sup> T cells of tdLN of 12-day old LLC-OVA bearing mice were co-cultured for 72h with TADC sorted from LLC-OVA tumors at a 1/2 TADC/T-cell ratio. T-cell proliferation was measured via <sup>3</sup>H-thymidine incorporation (cpm). n= pool of 12 tumors. Statistical analysis by one-way ANOVA. \*, p < 0.05; \*\*, p < 0.01; \*\*\*, p < 0.001; \*\*\*\*, p < 0.0001.

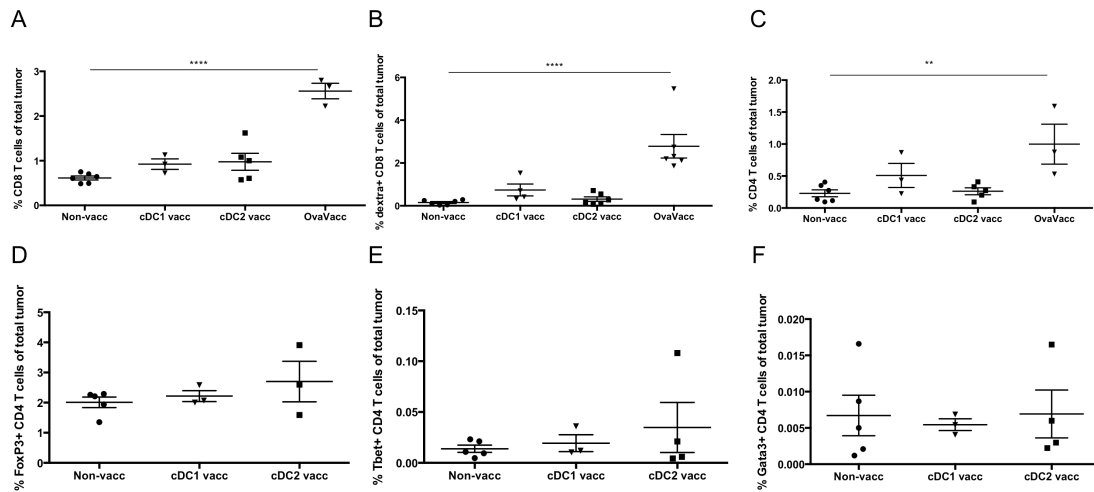

**Supplementary figure 9, related to main figure 8. cDC2 vaccination is more beneficial than cDC1 vaccination in LLC-OVA tumor-bearing mice and repolarizes CD4<sup>+</sup> T cells to a Th17 phenotype**

(A-F) Percentages of CD8<sup>+</sup> T cells (A), OVA-specific CD8<sup>+</sup> T cells (B), CD4<sup>+</sup> T cells (C), Foxp3<sup>+</sup> CD4<sup>+</sup> T cells (D), Tbet<sup>+</sup> CD4<sup>+</sup> T cells (E), Gata3<sup>+</sup> CD4<sup>+</sup> T cells (F), in LLC-OVA tumors after vaccination with LLC-OVA TADC subsets following the protocol depicted in (Figure 8A). For all experiments, results are representative of 2 independent experiments with n = 4-15 tumors. Statistical analysis by one-way ANOVA. \*, p < 0.05; \*\*, p < 0.01; \*\*\*, p < 0.001; \*\*\*\*, p < 0.0001.

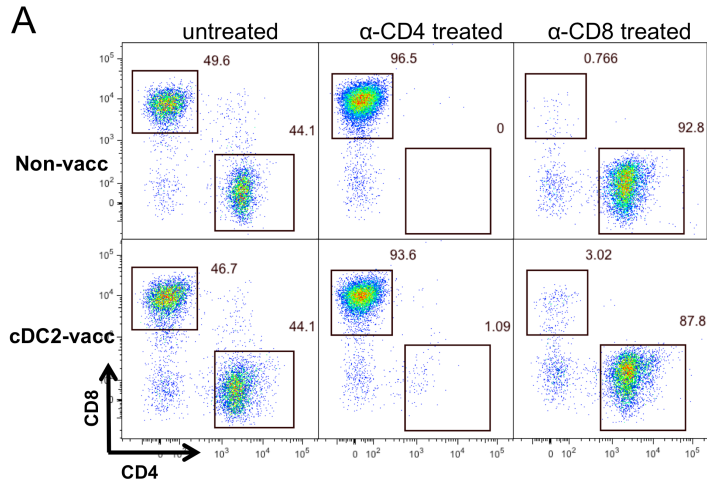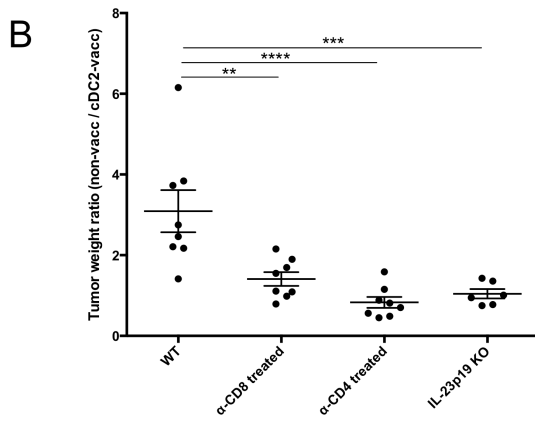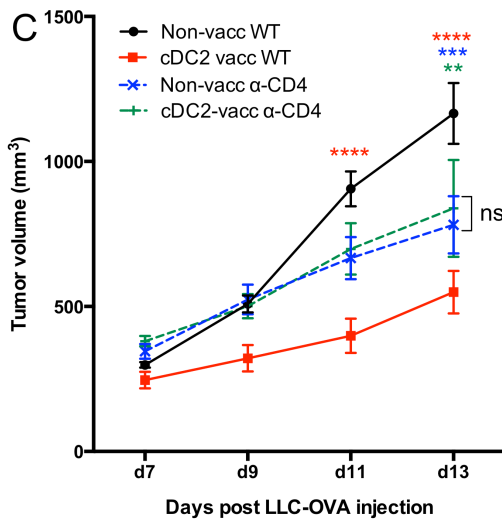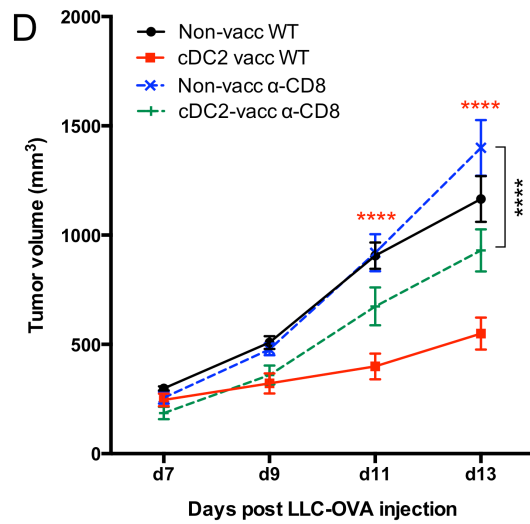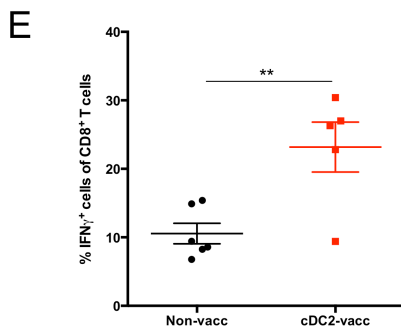

**Supplementary figure 10, related to main figure 8. The anti-tumor effects of cDC2 vaccination depend mainly on the induction of Th17 cells**

(A) Non-vaccinated or cDC2-vaccinated mice were treated every 2-3 days as from the day before tumor inoculation with anti-CD4 or anti-CD8 depleting Ab. Representative plots of blood of 13-day old LLC-OVA tumor-bearing mice gated on CD45<sup>+</sup> Tcrb<sup>+</sup> cells show the amount of CD4<sup>+</sup> and CD8<sup>+</sup> T cells. (B) Tumor weight ratio (non-vacc / cDC2-vacc) of LLC-OVA tumors after vaccination with LLC-OVA-derived cDC2 in WT, anti-CD8 treated, anti-CD4 treated and IL-23p19 KO mice. (C-D) Growth curve of LLC-OVA tumors after vaccination with LLC-OVA-derived cDC2 in untreated, anti-CD4 (C) or anti-CD8 (D) treated mice. (E) Percentages of IFN $\gamma$ <sup>+</sup> CD8<sup>+</sup> T cells in LLC-OVA tumors after vaccination with LLC-OVA-derived cDC2 following the protocol depicted in (Figure 8A). n  $\geq$  6. Statistical analysis by one-way ANOVA. \*, p < 0.05; \*\*, p < 0.01; \*\*\*, p < 0.001; \*\*\*\*, p < 0.0001.



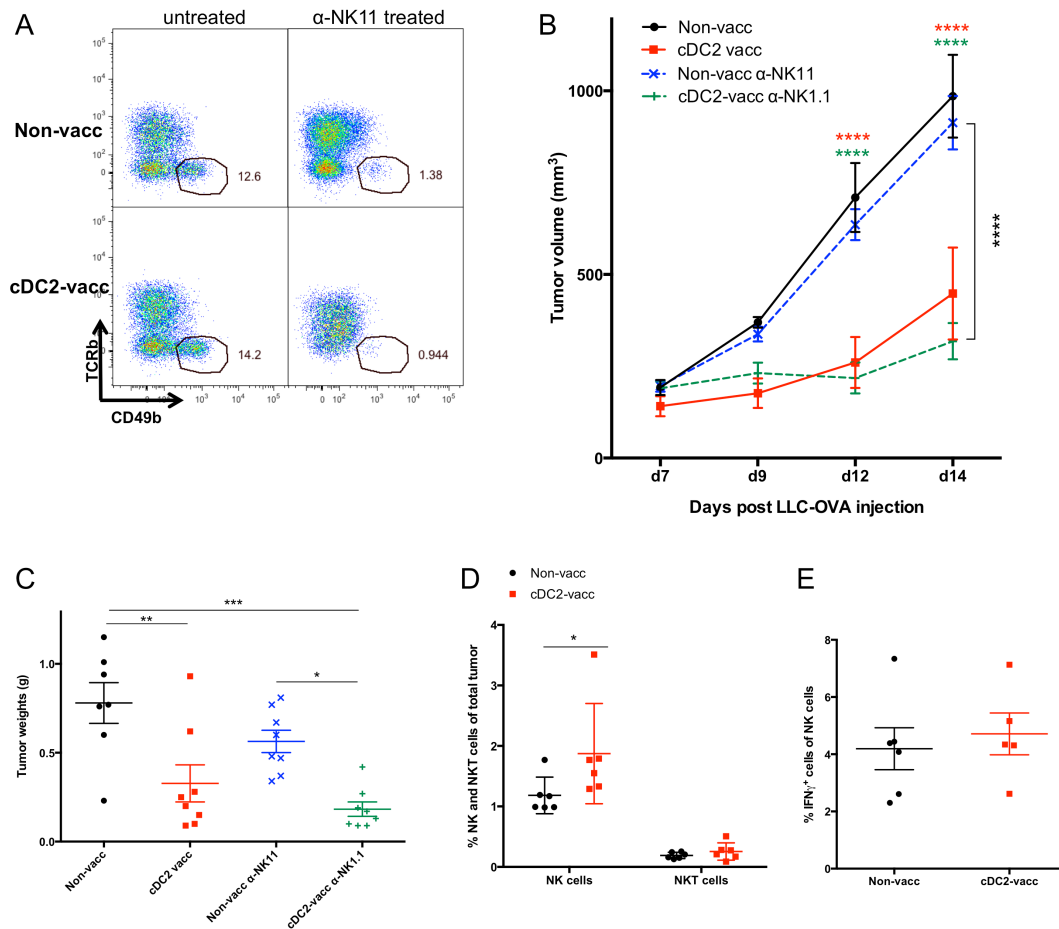

**Supplementary figure 11, related to main figure 8. NK cells are not involved in the anti-tumor protection conferred by cDC2 vaccination**

(A) Non-vaccinated or cDC2-vaccinated mice were treated every 2-3 days as from the day before tumor inoculation with anti-NK1.1 depleting Ab. Representative plots of 13-day old LLC-OVA tumors gated on CD45<sup>+</sup> CD11b<sup>-</sup> cells show the amount of NK cells. (B-C) Growth curve (B) and tumor weights (C) of LLC-OVA tumors after vaccination with LLC-OVA derived cDC2 in untreated or anti-NK1.1 treated mice. (D-E) Percentages of NK and NKT cells (D) and IFN $\gamma$ <sup>+</sup> NK cells (E) in LLC-OVA tumors after vaccination with LLC-OVA-derived cDC2 following the protocol depicted in Figure 8A. n  $\geq$  6. Statistical analysis by one-way ANOVA. \*, p < 0.05; \*\*, p < 0.01; \*\*\*, p < 0.001; \*\*\*\*, p < 0.0001.

## SUPPLEMENTARY EXPERIMENTAL PROCEDURES

**Supplementary table 1: Antibodies for flow cytometry (FACS)**

| Marker                                                                    | Dilution       | Clone                            | Source                             |
|---------------------------------------------------------------------------|----------------|----------------------------------|------------------------------------|
| 7AAD                                                                      | 1:100          | -                                | BD Biosciences                     |
| B220                                                                      | 1:600          | Ra3-6B2                          | BD Biosciences                     |
| BDCA-1 Biotin                                                             | 1:10           | AD5-8E7                          | Miltenyi                           |
| BDCA-2 PE                                                                 | 1:50           | AC144                            | Miltenyi                           |
| BDCA3-APC                                                                 | 1:10           | AD5-14H12                        | Miltenyi                           |
| CCR2 PE                                                                   | 1:40           | 475301                           | R&D systems                        |
| CCR3 PE                                                                   | 1:40           | 83101                            | R&D systems                        |
| CCR7 Biotin                                                               | 1:100          | 4B12                             | eBioscience                        |
| CD1d PE                                                                   | 1:600          | 1B1                              | BD Biosciences                     |
| CD3 FITC                                                                  | 1:50           | UCHT1                            | eBioscience                        |
| CD4 PerCP-Cy5.5 / Pe-Cy7 /<br>PE / APC                                    | 1:600          | RM4-5 / GK1.5 /<br>RM4-5 / RM4-5 | BD Biosciences /<br>eBioscience    |
| CD8a PE / PE / APC                                                        | 1:600          | YTS169.4 / 16-10A1/<br>53-6.7    | Life technologies /<br>eBioscience |
| CD11b BV605 / PerCP-Cy5.5<br>/ AF488 / PE-Cy7                             | 1:200<br>1:600 | M1/70                            | BD Biosciences /<br>eBioscience    |
| CD11c PerCP-Cy5.5 / FITC /<br>PE-Cy7 / PE-Cy7 (anti-<br>human) / PE / APC | 1:600<br>1:20  | N418 / N418 / HL3 /<br>3.9 / HL3 | BD Biosciences /<br>eBioscience    |
| CD14 PB                                                                   | 1:100          | TuK4                             | Invitrogen                         |
| CD16 PE-TexasRed                                                          | 1:100          | 3G8                              | Invitrogen                         |
| CD19 FITC / PE                                                            | 1:20 / 1:600   | HIB19 / 1D3                      | BD Biosciences                     |
| CD24 PE / PE-Cy7                                                          | 1:600          | M1/69                            | eBioscience                        |
| CD25 FITC                                                                 | 1:600          | 3C7                              | Biolegend                          |
| CD40 FITC                                                                 | 1:600          | 3/23                             | BD Biosciences                     |
| CD45 APC-Cy7 / BV421 /                                                    | 1:600          | 30-F11 / 30-F11 /                | Biolegend / BD                     |
| CD45.1 FITC                                                               | 1:600          | A20                              | eBioscience                        |
| CD45.2 AF700                                                              | 1:600          | 104                              | eBioscience                        |
| CD49b APC                                                                 | 1:600          | DX5                              | eBioscience                        |
| CD56 FITC                                                                 | 1:10           | MEM188                           | eBioscience                        |
| CD64 PE / APC                                                             | 1:600          | Y54-5/7.1                        | Biolegend                          |
| CD80 PE                                                                   | 1:600          | 16-10A1                          | BD Biosciences                     |
| CD86 PE                                                                   | 1:600          | GI-1                             | BD Biosciences                     |
| CD103 biotin                                                              | 1:600          | M290                             | BD Biosciences                     |

|                                           |        |                                    |                                 |
|-------------------------------------------|--------|------------------------------------|---------------------------------|
| CD127 eFluor450                           | 1:600  | A7R34                              | eBioscience                     |
| CD172a PE / APC                           | 1:600  | P84                                | BD Biosciences/                 |
| DEC-205 PE                                | 1:600  | 205yekta                           | eBioscience                     |
| Donkey anti-goat IgG AF647                | 1:1000 | Polyclonal                         | Invitrogen                      |
| F4/80 PE / FITC / AF488                   | 1:200  | Cl:A3-1                            | Biorad                          |
| FcεR1 Biotin                              | 1:600  | MAR-1                              | eBioscience                     |
| Fixable Live/Dead stain                   | 1:1000 | /                                  | eBioscience                     |
| Foxp3 PerCP-Cy5.5                         | 1:100  | FJK-16s                            | eBioscience                     |
| Gata-3 AF647                              | 1:100  | TWAJ                               | eBioscience                     |
| Goat anti-rabbit                          | 1:40   | Polyclonal IgG                     | Life Technologies               |
| Goat IgG control biotin                   | 1:100  | Polyclonal goat IgG                | R&D systems                     |
| IA/IE BV421 / PerCP-Cy5.5 / APC-eFluor780 | 1:600  | M5/114.15.2                        | BD Biosciences /<br>Biolegend/  |
| IFN-γ PE / APC                            | 1:100  | XMG1.2                             | BD Biosciences /                |
| iso hamster IgG1, λ1 PE                   | 1:600  | G235-2356                          | BD Biosciences                  |
| Iso mouse IgG1 k eFluor660                | 1:100  | eP3.6.2.8.1                        | eBioscience                     |
| Iso Rat IgG1 k PE / APC                   | 1:600  | R3-34 / eBRG1                      | BD Biosciences/                 |
| iso rat IgG2a Biotin / FITC / PE / APC    | 1:600  | eBR2a / R35-95 /<br>R35-95 / eBR2a | BD Biosciences /<br>eBioscience |
| iso rat IgG2b, κ, PE / AF647              | 1:600  | A95-1 / eB149/10H5                 | BD Biosciences /                |
| IRF4 unlabeled                            | 1:400  | M-17                               | Santa Cruz                      |
| IRF8 PerCP-Cy5.5                          | 1:400  | V3GYWCH                            | eBioscience                     |
| HLA-DR APC-Cy7                            | 1:100  | LN3                                | eBioscience                     |
| Ly6C AF488 / AF647                        | 1:600  | ER-MP20                            | Serotec                         |
| Ly6G FITC / PE                            | 1:600  | 1A8                                | BD Biosciences                  |
| MerTK Biotin                              | 1:100  | Polyclonal goat IgG                | R&D systems                     |
| MitoSOX™ Red (MitO2)                      | 1:2000 | /                                  | Life Technologies               |
| NK1.1 FITC/PE                             | 1:600  | PK136                              | eBioscience                     |
| NOS2 unlabeled                            | 1:40   | M17                                | Santa Cruz                      |
| PD-L1 (B7-H1) PE                          | 1:600  | MIH5                               | BD Biosciences                  |
| PD-L2 (B7-DC) PE                          | 1:600  | TY25                               | eBioscience                     |
| Rabbit IgG unlabeled                      | 1:400  | Polyclonal rabbit IgG              | Santa Cruz                      |
| RORγt APC                                 | 1:100  | AFKJS-9                            | eBioscience                     |
| SiglecF PE                                | 1:600  | E50-2440                           | BD Biosciences                  |
| SIINFEKL Biotin                           | 1:100  | eBio25-D1.16                       | eBioscience                     |
| SIINFEKL class I MHC dextramer APC        | 1:5    | /                                  | Immudex                         |
| Streptavidin BV786/ PE                    | 1:200  | Streptavidin                       | BD Biosciences                  |
| T-bet eFluor660                           | 1:100  | eBio4B10                           | eBioscience                     |
| TCRb BV421 / FITC                         | 1:600  | H57-597                            | BD Biosciences /                |
| TNF-α PE                                  | 1:100  | MP6-XT22                           | eBioscience                     |



**Supplementary table 2: Primer sequences for qRT-PCR.**

| <b>Gene</b>                    | <b>Forward Primer</b> | <b>Reverse Primer</b> |
|--------------------------------|-----------------------|-----------------------|
| <i>Arg1</i>                    | TCACCTGAGCTTTGATGTCG  | TTATGGTTACCCTCCCGTTG  |
| <i>Il1b</i>                    | GTGTGGATCCAAAGCAATAC  | GTCTGCTCATTTCATGACAAG |
| <i>Il4ra</i>                   | GCAGATGGCTCATGTCTGAA  | CTCTGGGAAGCTGGGTGTAG  |
| <i>Il12b</i>                   | TCAGGGACATCATCAAACCA  | CTACGAGGAACGCACCTTTC  |
| <i>MMP9</i>                    | TGAATCAGCTGGCTTTTGTG  | GTGGATAGCTCGGTGGTGT   |
| <i>Mrc1 (MMR)</i>              | GCAAATGGAGCCGTCTGTGC  | CTCGTGGATCTCCGTGACAC  |
| <i>Nos2 (iNOS)</i>             | GCTTCTGGTCGATGTCATGAG | TCCACCAGGAGATGTTGAAC  |
| <i>OVAL (of Gallus gallus)</i> | CGTGGATTCTCAAACCTGCAA | CACCAACATGCTCATTGTCC  |
| <i>Ptgs2 (COX2)</i>            | CAGGCTGAACTTCGAAACAG  | CAGCTACGAAAACCCAATCA  |
| <i>Stab1</i>                   | ACGGGAAACTGCTTGATGTC  | ACTCAGCGTCATGTTGTCCA  |
| <i>Tnf</i>                     | CCTTCACAGAGCAATGACTC  | GTCTACTCCCAGGTTCTCTTC |
